# Supplementary material
Source: PubMed Central journal article supplement (PMC6791324)
Supplement: supp_AC119.010236_153926_1_supp_384216_pwpvz4.pdf [file supp_AC119.010236_153926_1_supp_384216_pwpvz4.pdf]

## **Supporting information**

### **Molecular interaction site on procoagulant myosin for factor Xa-dependent prothrombin activation**

Hiroshi Deguchi<sup>1</sup>, Zihan Guo<sup>1</sup>, Mohammed Hayat<sup>1</sup>, Elsa Pflimlin<sup>2</sup>, Sam Lear<sup>2</sup>, Weijun Shen<sup>2\*</sup>, and John H. Griffin<sup>1\*</sup>

From the <sup>1</sup>Department of Molecular Medicine, The Scripps Research Institute, 10550 North Torrey Pines Rd, La Jolla, CA 92037; <sup>2</sup>Calibr, a Division of Scripps Research, 11119 North Torrey Pines Rd, La Jolla, CA 92037.

#### **S-2: SUPPLEMENTAL MATERIALS AND METHODS**

**S-3: Table S1. Initial ELC Peptides screened for inhibition of myosin-enhanced prothrombin activation.**

**S-4: Figure S1. Inhibition of prothrombin activation by TFP or myosin peptides in the presence or absence of myosin**

**S-5: Figure S2. Peptide screening for their inhibition of Tissue Factor-induced thrombin generation in human plasma.**

## **SUPPLEMENTAL MATERIALS AND METHODS**

### **Materials**

Human factors Xa and Va were from Hematologic Technologies Inc. (Essex Junction, VT), prothrombin from Enzyme Research Laboratories (South Bend, IN), thrombin chromogenic substrate (H-D-Phe-Pip-Arg-pNA · 2HCl) from Molecular Innovations, Inc. (Novi MI), fluorogenic substrate I-1140 from Bachem Bioscience Inc. (King of Prussia, PA), Innovin from DADE Behring, Marburg, Germany, rabbit skeletal muscle myosin from Cytoskeleton, Inc. (Denver, CO) or Sigma, fatty acid-free and protease-free bovine serum albumin (BSA) from Sigma, trifluoperazine (TFP), (-)-blebbistatin, CK-1827452, and BTS from MP biochemical (Santa Ana, CA), Cayman Chemical Company (Ann Arbor, Michigan), Toronto Research Chemicals Inc (North York, Ontario, Canada), and Millipore Sigma (Burlington, MA), respectively. L- $\alpha$ -PS and L- $\alpha$ -PC (PC)(each from porcine brain) were from Avanti Polar Lipids (Alabaster, AL).

### **Peptide design and synthesis**

3 peptides representing 129-161 amino acid residues of skeletal muscle myosin ELC and containing overlaps of 7-10 amino acids were synthesized using standard solid phase peptide synthesis and Fmoc chemistry by Synthetic Biomolecules (San Diego, CA) and purified to > 90% by HPLC (**Table 1S**).

Nineteen 18-40-mer peptides containing 6-22 amino acid-overlaps representing the skeletal muscle myosin neck region were synthesized using standard solid phase peptide synthesis and Fmoc chemistry by Cellmano Biotech Limited (Hefei, China), Shanghai Apeptide Co (Shanghai, China) or Shanghai Dechi Biosciences Co. (Shanghai, China), and purified to > 90% by HPLC. Peptide identity was confirmed by high resolution mass spectra (HRMS) that were recorded on an Agilent 1200 Series Accurate Mass Time-of-Flight (TOF) with an Aeris Widepore column (XB-C8, 3.6  $\mu$ m particle size, 150  $\times$  2.1 mm, flow: 0.5mL/min).

**Table S1. Initial ELC Peptides screened for inhibition of myosin-enhanced prothrombin activation.**

| <b>residues</b>    | <b><i>sequence</i></b>                        |
|--------------------|-----------------------------------------------|
| <b>ELC 129-144</b> | <b>Ac-YEDFVEGLRVFDKEGN-NH<sub>2</sub></b>     |
| <b>ELC 138-157</b> | <b>Ac-RVFDKEGNGTVMGAELRHVL-NH<sub>2</sub></b> |
| <b>ELC 146-161</b> | <b>Ac-GTVMGAELRHVLATLGEK-NH<sub>2</sub></b>   |

Figure S1

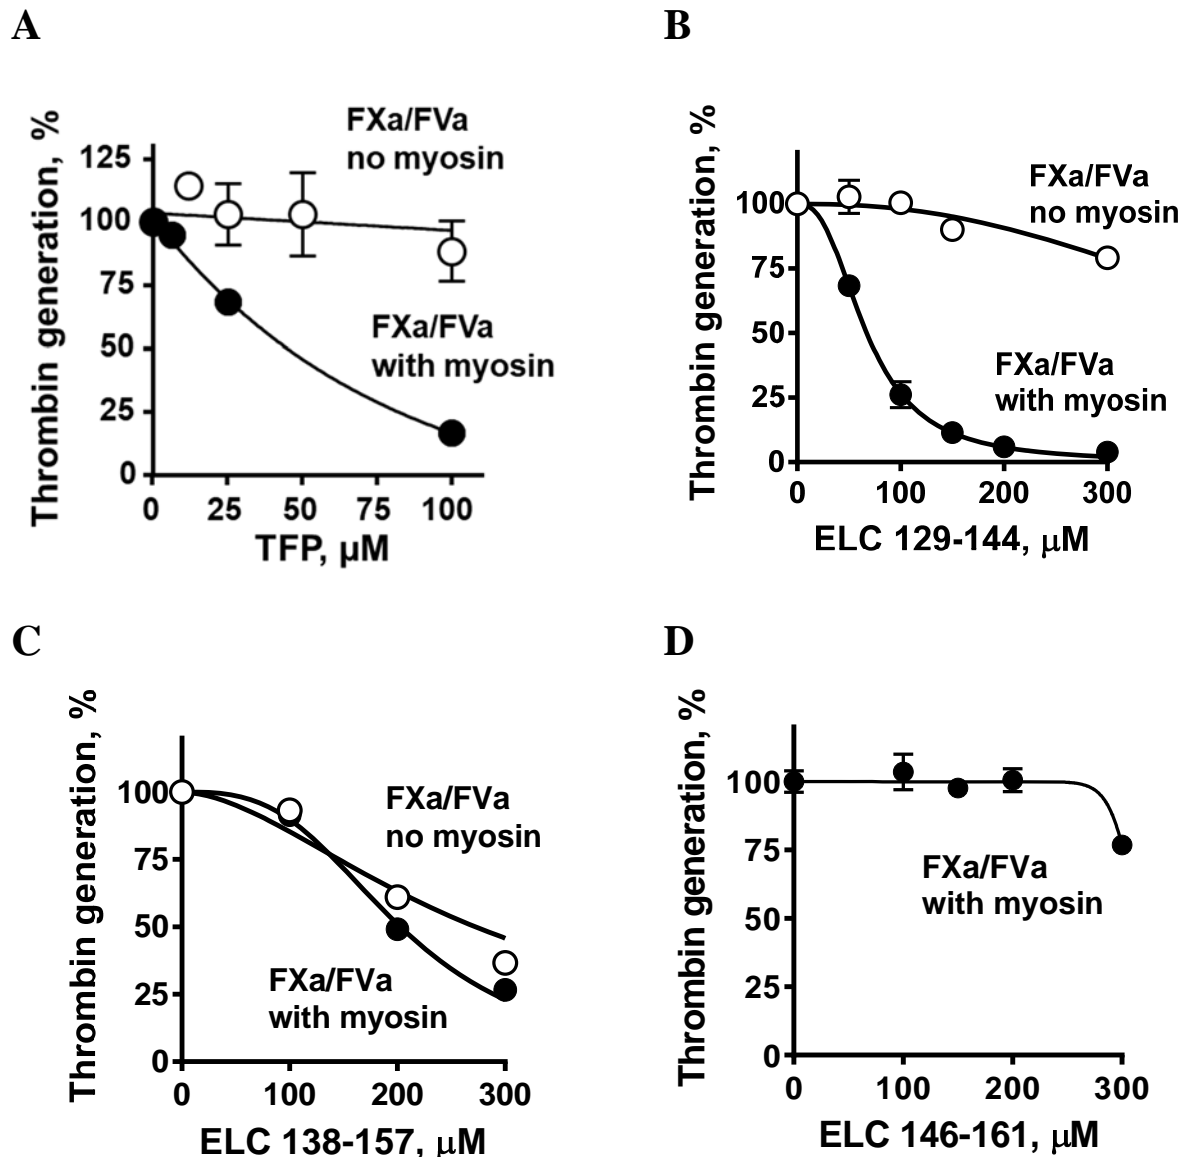

**Figure S1. Inhibition of prothrombin activation by TFP or myosin peptides in the presence or absence of myosin.** Varying concentrations of TFP (0–100  $\mu\text{M}$ ) (A) or peptides ELC129-144 (B), ELC138-157 (C) and ELC146-161 (D) (0–300  $\mu\text{M}$ ) were incubated with factor Va (5 nM, final) and factor Xa (0.2 nM, final) in TBSA plus 5 mM  $\text{CaCl}_2$  at room temperature in the presence or absence of skeletal muscle myosin (2 nM, final). Thrombin generation was initiated by the addition of prothrombin (0.75  $\mu\text{M}$ ) in TBSA containing 5 mM  $\text{CaCl}_2$ . The reaction was quenched by adding EDTA (10 mM final) at 10 min. Thrombin formation was quantified by the rate of substrate (Pefa TH) hydrolysis. 100 % was the value for controls in the absence of added peptides. Each value represents the mean [ $\pm$  SEM] of at least triplicate determinations.

**Figure S2**

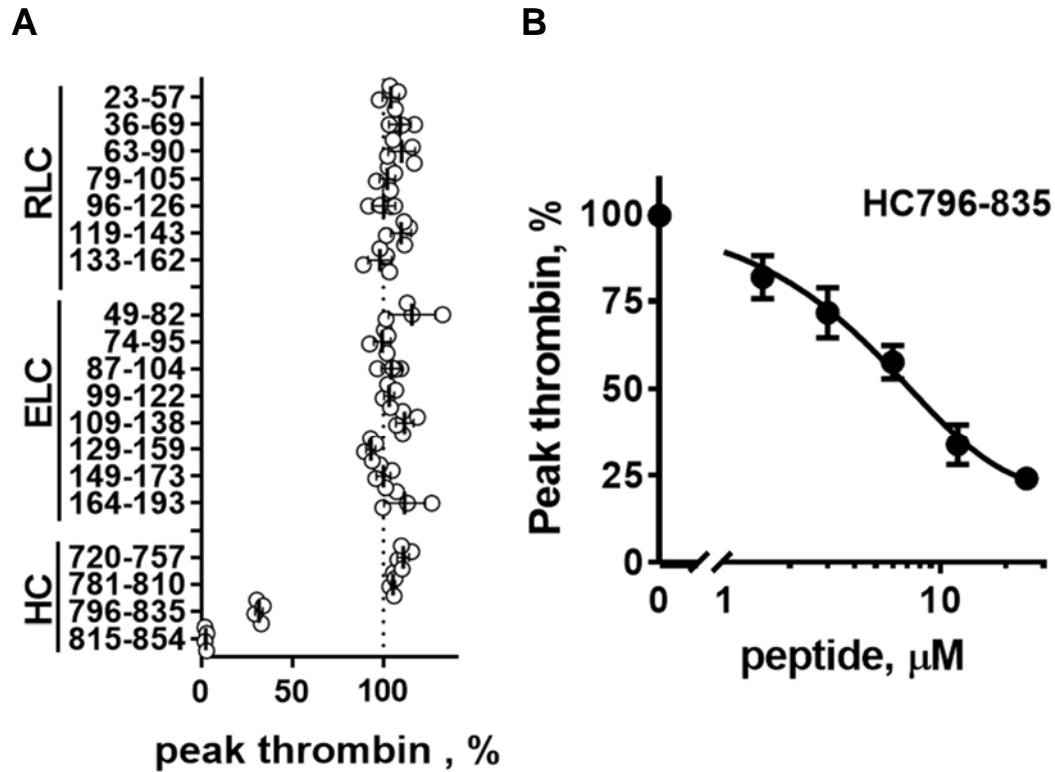

**Figure S2. Peptide screening for their inhibition of Tissue Factor-induced thrombin generation in human plasma.**

(A) 19 myosin-derived peptides (100  $\mu\text{M}$ , final) were assayed for their ability to inhibit thrombin generation in human plasma, as described in Experimental procedures. 100 % was the peak thrombin value for controls in the absence of added peptides. Each value represents the mean [ $\pm$  SD] of quadruplicate determinations.

(B) Varying concentrations of peptide HC 796-835 (0–25  $\mu\text{M}$ , final) were assayed for their ability to inhibit thrombin generation in human plasma, as described in **Experimental procedures**. 100 % was the peak thrombin value for controls in the absence of added peptides. Each value represents the mean [ $\pm$  SEM] of quadruplicate determinations.
